# Supplementary material for: A novel adsorbent of Ag-FMWCNTs for the removal of SMX from aqueous solution
Source: Royal Society of Chemistry journal article supplement (doi:10.1039/c6ra15206f), 2016-01-01
Supplement: c6ra15206f1.pdf [file c6ra15206f1.pdf]

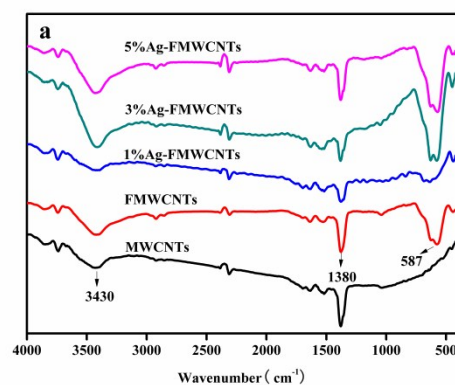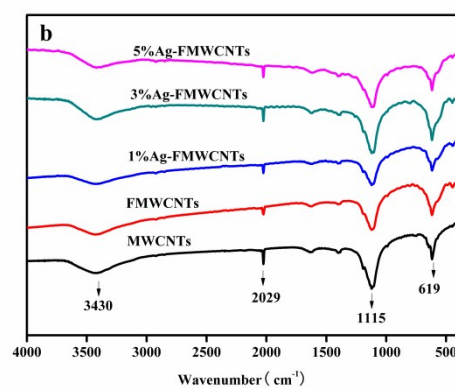

**Fig. S1** FT-IR spectra of MWCNTs and modified MWCNTs composites before (a) and after adsorption (b).

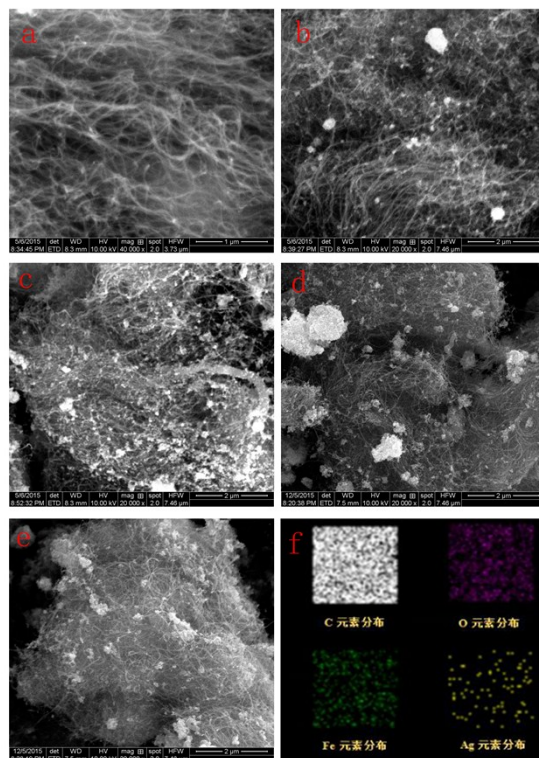

**Fig. S2** SEM image of prepared MWCNTs (a), FMWCNTs (b), 1% Ag-FMWCNTs (c), 3% Ag-FMWCNTs (d) and 5% Ag-FMWCNTs (e). EDS image of 5% Ag-FMWCNTs (f).

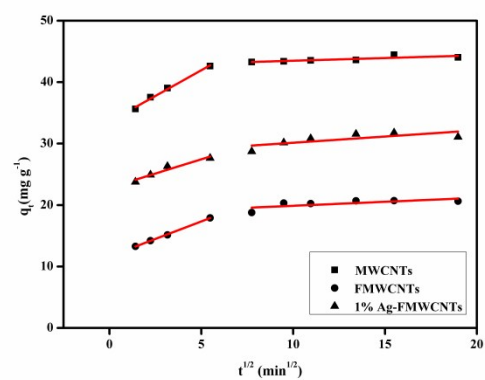

**Fig. S3** Intraparticle diffusion model plots of SMX adsorption on MWCNTs, FMWCNTs and 1% Ag-FMWCNTs.
